# Supplementary material for: Research priorities for nurses in antimicrobial stewardship in a middle-income country: a nominal group technique study
Source: Research Square preprint supplement (doi:10.21203/rs.3.rs-4391774/v1), 2024-05-28
Supplement: Supplementary file 1 [file 7e7814e662befb407d296ee5.docx]

**Additional file**  Details of the distribution of healthcare facilities, and the proposed matrix of participant’s

Figure 1. Percentage distribution of health facilities by region in Brazil, 2022 (%).

Primary Health Care: 49.577

General Hospitals: 6.513

University Hospitals: 41

Source:

Cadastro Nacional de Estabelecimentos de Saúde <http://cnes2.datasus.gov.br/> - Extraction date: 19/03/2022.

Ministry of Education <http://portal.mec.gov.br/hospitais-universitarios?id=13808> – Extraction date: 19/03/2022.

*Posto de saúde, Centro de saúde/Unidade básica, Centro de apoio à saúde da família, Unidade de atenção à saúde indígena, Unidade móvel fluvial.

§Policlínica, Hospital geral, Hospital especializado, Unidade mista, Pronto socorro geral, Pronto socorro especializado, Consultório isolado, Clínica/Centro de especialidade, Unidade móvel terrestre, Centro de parto normal – isolado, Hospital-dia, Pronto atendimento, Serviço de atenção domiciliar isolado (home care).

Table 2. Proportion matrix with distribution of participants according to type of health facility and regions of Brazil, 2022 (n).

|  | ***Central-West*** | | ***Northeast*** | | ***North*** | | ***Southeast*** | | ***South*** | | ***Total*** | |
| --- | --- | --- | --- | --- | --- | --- | --- | --- | --- | --- | --- | --- |
| ***Planned*** | ***Acquired*** | ***Planned*** | ***Acquired*** | ***Planned*** | ***Acquired*** | ***Planned*** | ***Acquired*** | ***Planned*** | ***Acquired*** | ***Planned*** | ***Acquired*** |
| *Outpatient* | 1 | 1 | 3 | 0 | 1 | 1 | 3 | 2 | 1 | 0 | 9 | 4 |
| *Hospitals* | 1 | 1 | 2 | 2 | 1 | 1 | 3 | 6 | 1 | 1 | 8 | 11 |
| *Academics* | 1 | 1 | 3 | 2 | 1 | 0 | 3 | 2 | 1 | 1 | 9 | 6 |
| *Other** | 1 | 1 | 1 | 0 | 1 | 1 | 1 | 2 | 1 | 1 | 5 | 5 |
| Total | 4 | 4 | 9 | 4 | 4 | 3 | 10 | 12 | 4 | 3 | 31 | 26 |

*Healthcare surveillance agencies, professional councils, nursing management, professional associations experts in IPC.
